# Supplementary material
Source: publisher figshare collection journal article supplement (https://sage.figshare.com/ndownloader/files/22217190)
Supplement: Supplementary file [file 22217190]

## Appendix F

## Baujat Plot

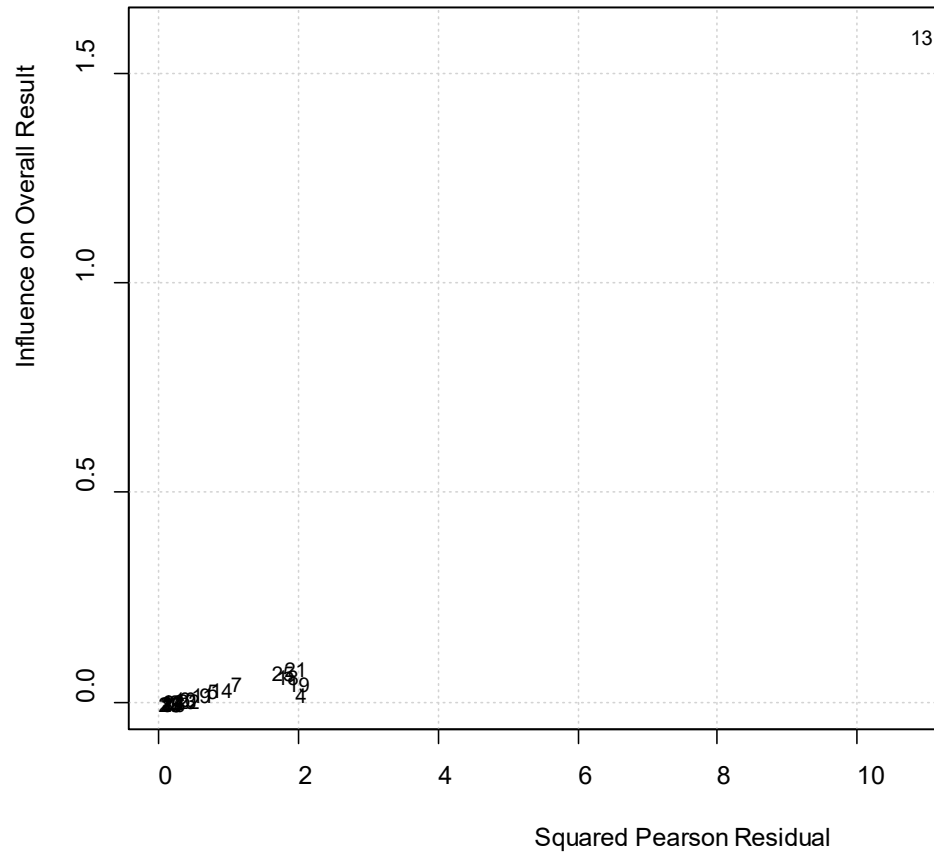

*Note.* Study 13 (top right corner) is the third study presented in the manuscript by Hom, Chu et al. (2017).
